# Supplementary material for: Whole transcriptome sequencing identifies key circRNAs, lncRNAs, and miRNAs regulating neurogenesis in developing mouse retina
Source: PubMed Central journal article supplement (PMC8557489; doi:10.1186/s12864-021-08078-z), 2021-10-30
Supplement: 12864_2021_8078_MOESM1_ESM.pdf [file 12864_2021_8078_MOESM1_ESM.pdf]

## Supplemental Figures

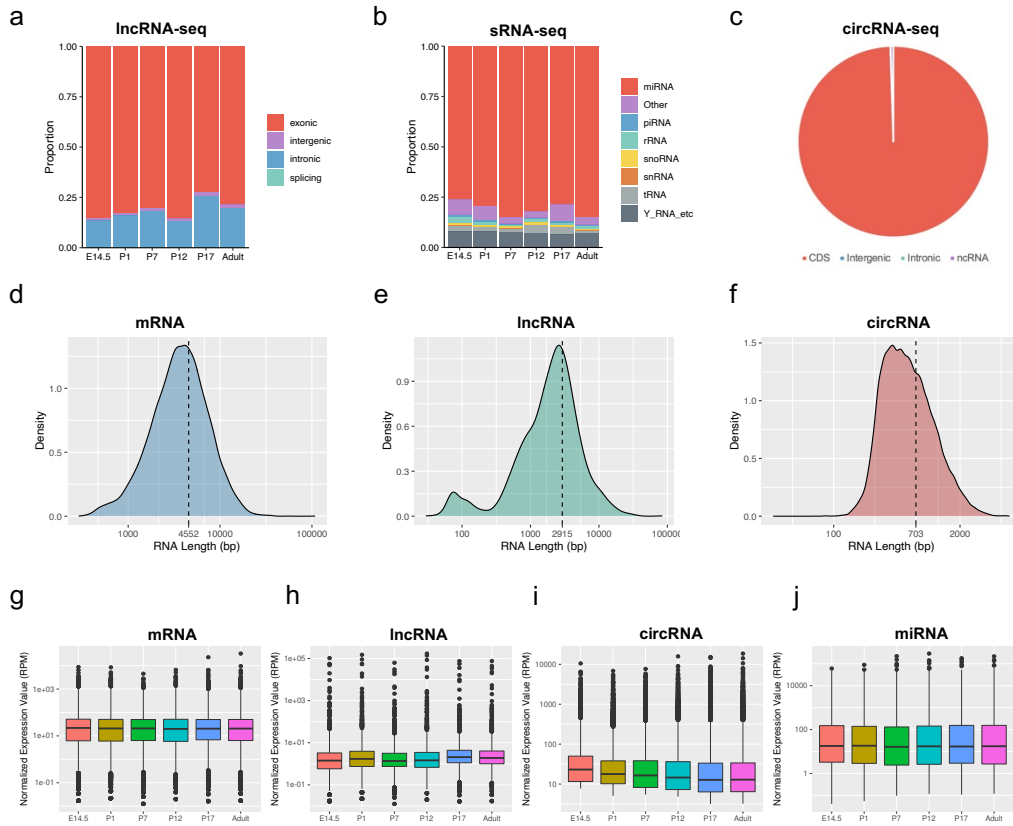

**Supplementary Figure 1. Whole-transcriptome sequencing data summary. (a-c)** Transcripts annotation from lncRNA-seq, sRNA-seq and circRNA-seq. **(d-f)** Length density plot of mRNA, lncRNA and circRNA. **(g-j)** Expression abundance of four class of transcriptomes across six developmental stages.

a

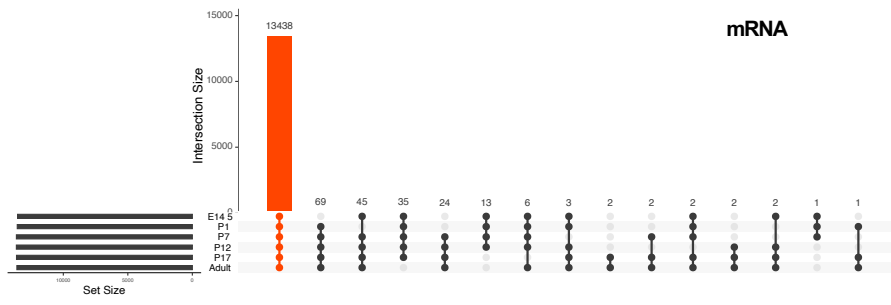

b

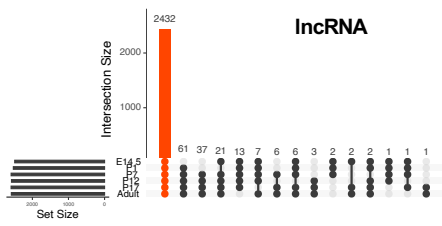

c

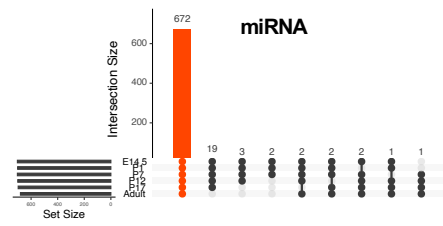

**Supplementary Figure 2. Upset plot of intersected transcripts in six stages. (a-c) Overlapped lncRNA, mRNA and miRNA numbers in different stages.**
